# Supplementary material for: Setting-up a cross-border action-research project to control malaria in remote areas of the Amazon: describing the birth and milestones of a complex international project (Malakit)
Source: PubMed Central journal article supplement (PMC8111981; doi:10.1186/s12936-021-03748-5), 2021-05-11

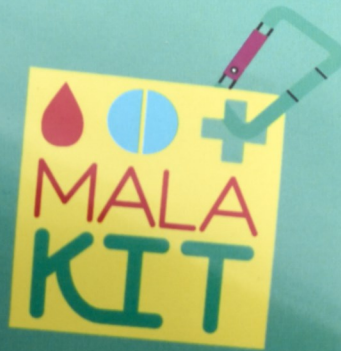

Quando se sentir doente, o melhor é você se consultar em algum Centro de Saúde  
**Atenção: se o teste for negativo não use coartem**

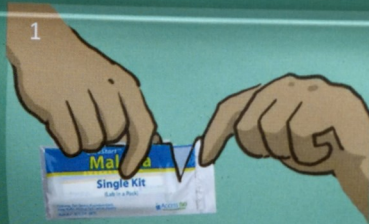

1 Retire todo o material de dentro do kit e coloque na sua frente.

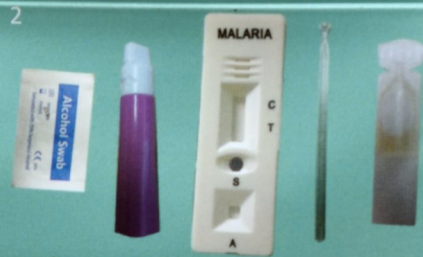

2 Coloque todos os itens que você vai usar sobre a mesa em ordem

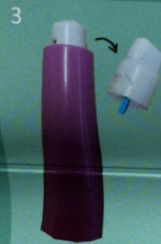

3 remova a tampa da lanceta

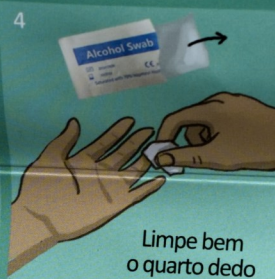

4 Limpe bem o quarto dedo com o álcool

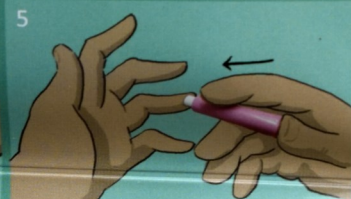

5 Aperta a lanceta para furar o dedo, ao soltar, a agulha volta por si só

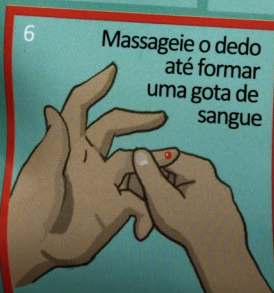

6 Massageie o dedo até formar uma gota de sangue

**E preciso formar uma gota com o sangue**

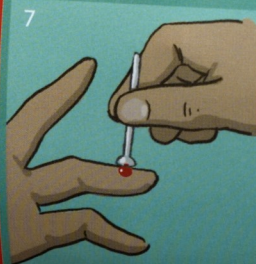

7 Pegue uma gota de sangue com a pipeta

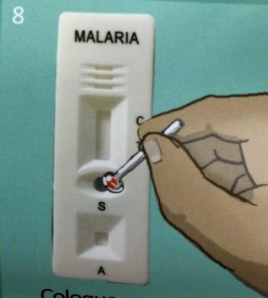

8 Coloque a gota no poço marcado S

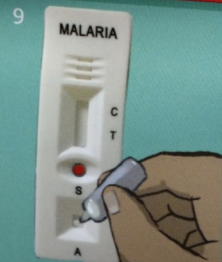

9 - Coloque 3 gotas do líquido no poço marcado A

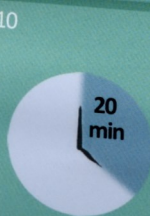

10 Espere 20 minutos sobre uma superfície plana.

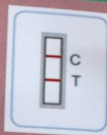

2 linhas = Positivo

Faça o tratamento contra a malária

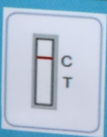

Linha C = Negativo

Não faça o tratamento contra a malária

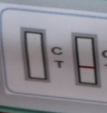

Nenhuma linha ou apenas uma linha no nível da letra T = inválido  
refazer o teste

Tome paracetamol se você tiver febre ou dores

CareStart™  
**Malaria**

**Single Kit**

(Lab in a Pack)

Rapid Malaria Antigen Whole Blood Test Professional Use Only  
Contents : Test Device, Procedure Card,  
Assay Buffer Vial, Alcohol Pad, Lancet, Pipette

40°C  
(104°F)  
1°C  
(34°F)

ACCESSBIO  
www.accessbio.net

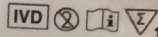

CareStart™  
**Malaria**

**Single Kit**

(Lab in a Pack)

Rapid Malaria Antigen Whole Blood Test Professional Use Only  
Contents : Test Device, Procedure Card,  
Assay Buffer Vial, Alcohol Pad, Lancet, Pipette

40°C  
(104°F)  
1°C  
(34°F)

ACCESSBIO  
www.accessbio.net

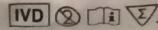

CareStart™  
**Malaria**

**Single Kit**

(Lab in a Pack)

Rapid Malaria Antigen Whole Blood Test Professional Use Only  
Contents : Test Device, Procedure Card,  
Assay Buffer Vial, Alcohol Pad, Lancet, Pipette

40°C  
(104°F)  
1°C  
(34°F)

ACCESSBIO  
www.accessbio.net

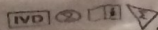

Supplement: 12936_2021_3748_MOESM4_ESM.pdf [file 12936_2021_3748_MOESM4_ESM.pdf]
