# Supplementary material for: Setting-up a cross-border action-research project to control malaria in remote areas of the Amazon: describing the birth and milestones of a complex international project (Malakit)
Source: PubMed Central journal article supplement (PMC8111981; doi:10.1186/s12936-021-03748-5), 2021-05-11

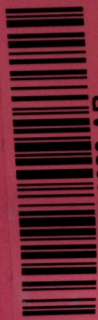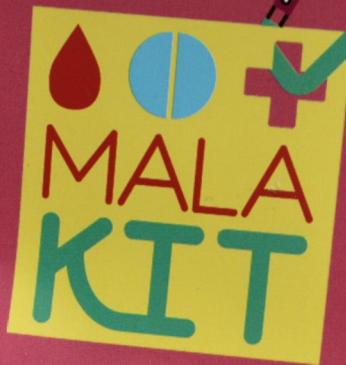

Se não melhorar, procure se consultar em algum Centro de Saúde  
Atenção: se o teste for negativo não use coartem

### PARACETAMOL

Tome em caso de febre ou dor

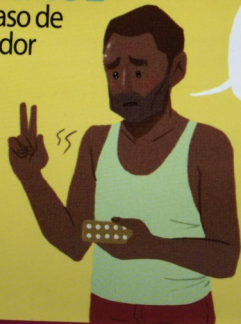

Eu tomo 2 comprimidos de paracetamol por dose, no máximo 3 vezes por dia.

Se o resultado do teste malária é positivo  
Faça o tratamento COMPLETO

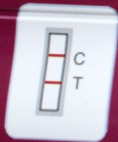

Tome 2 comprimidos de primaquine com o Coartem

PRIMAQUINE

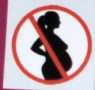

### Tome COARTEM

4 comprimidos pela manhã e 4 comprimidos à noite por 3 dias

Dia 1

Com muita Malária muita febre e mal estar

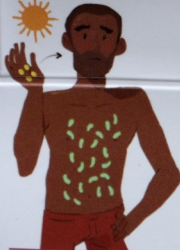

COARTEM começa a acabar com a Malária

Dia 2

A Malária vai melhorando

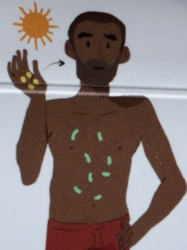

Já quase sem febre mas ainda com Malária

Dia 3

Sem febre mas ainda com Malária ela pode voltar

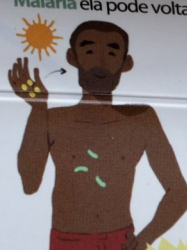

Acabe o tratamento completo para a Malária não voltar

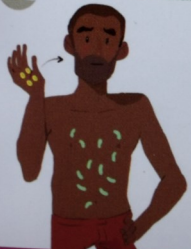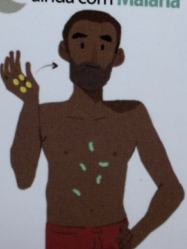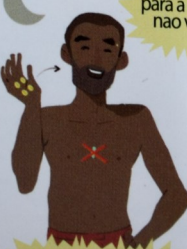

PARABENS! VOCE ESTA LIVRE DA MALÁRIA

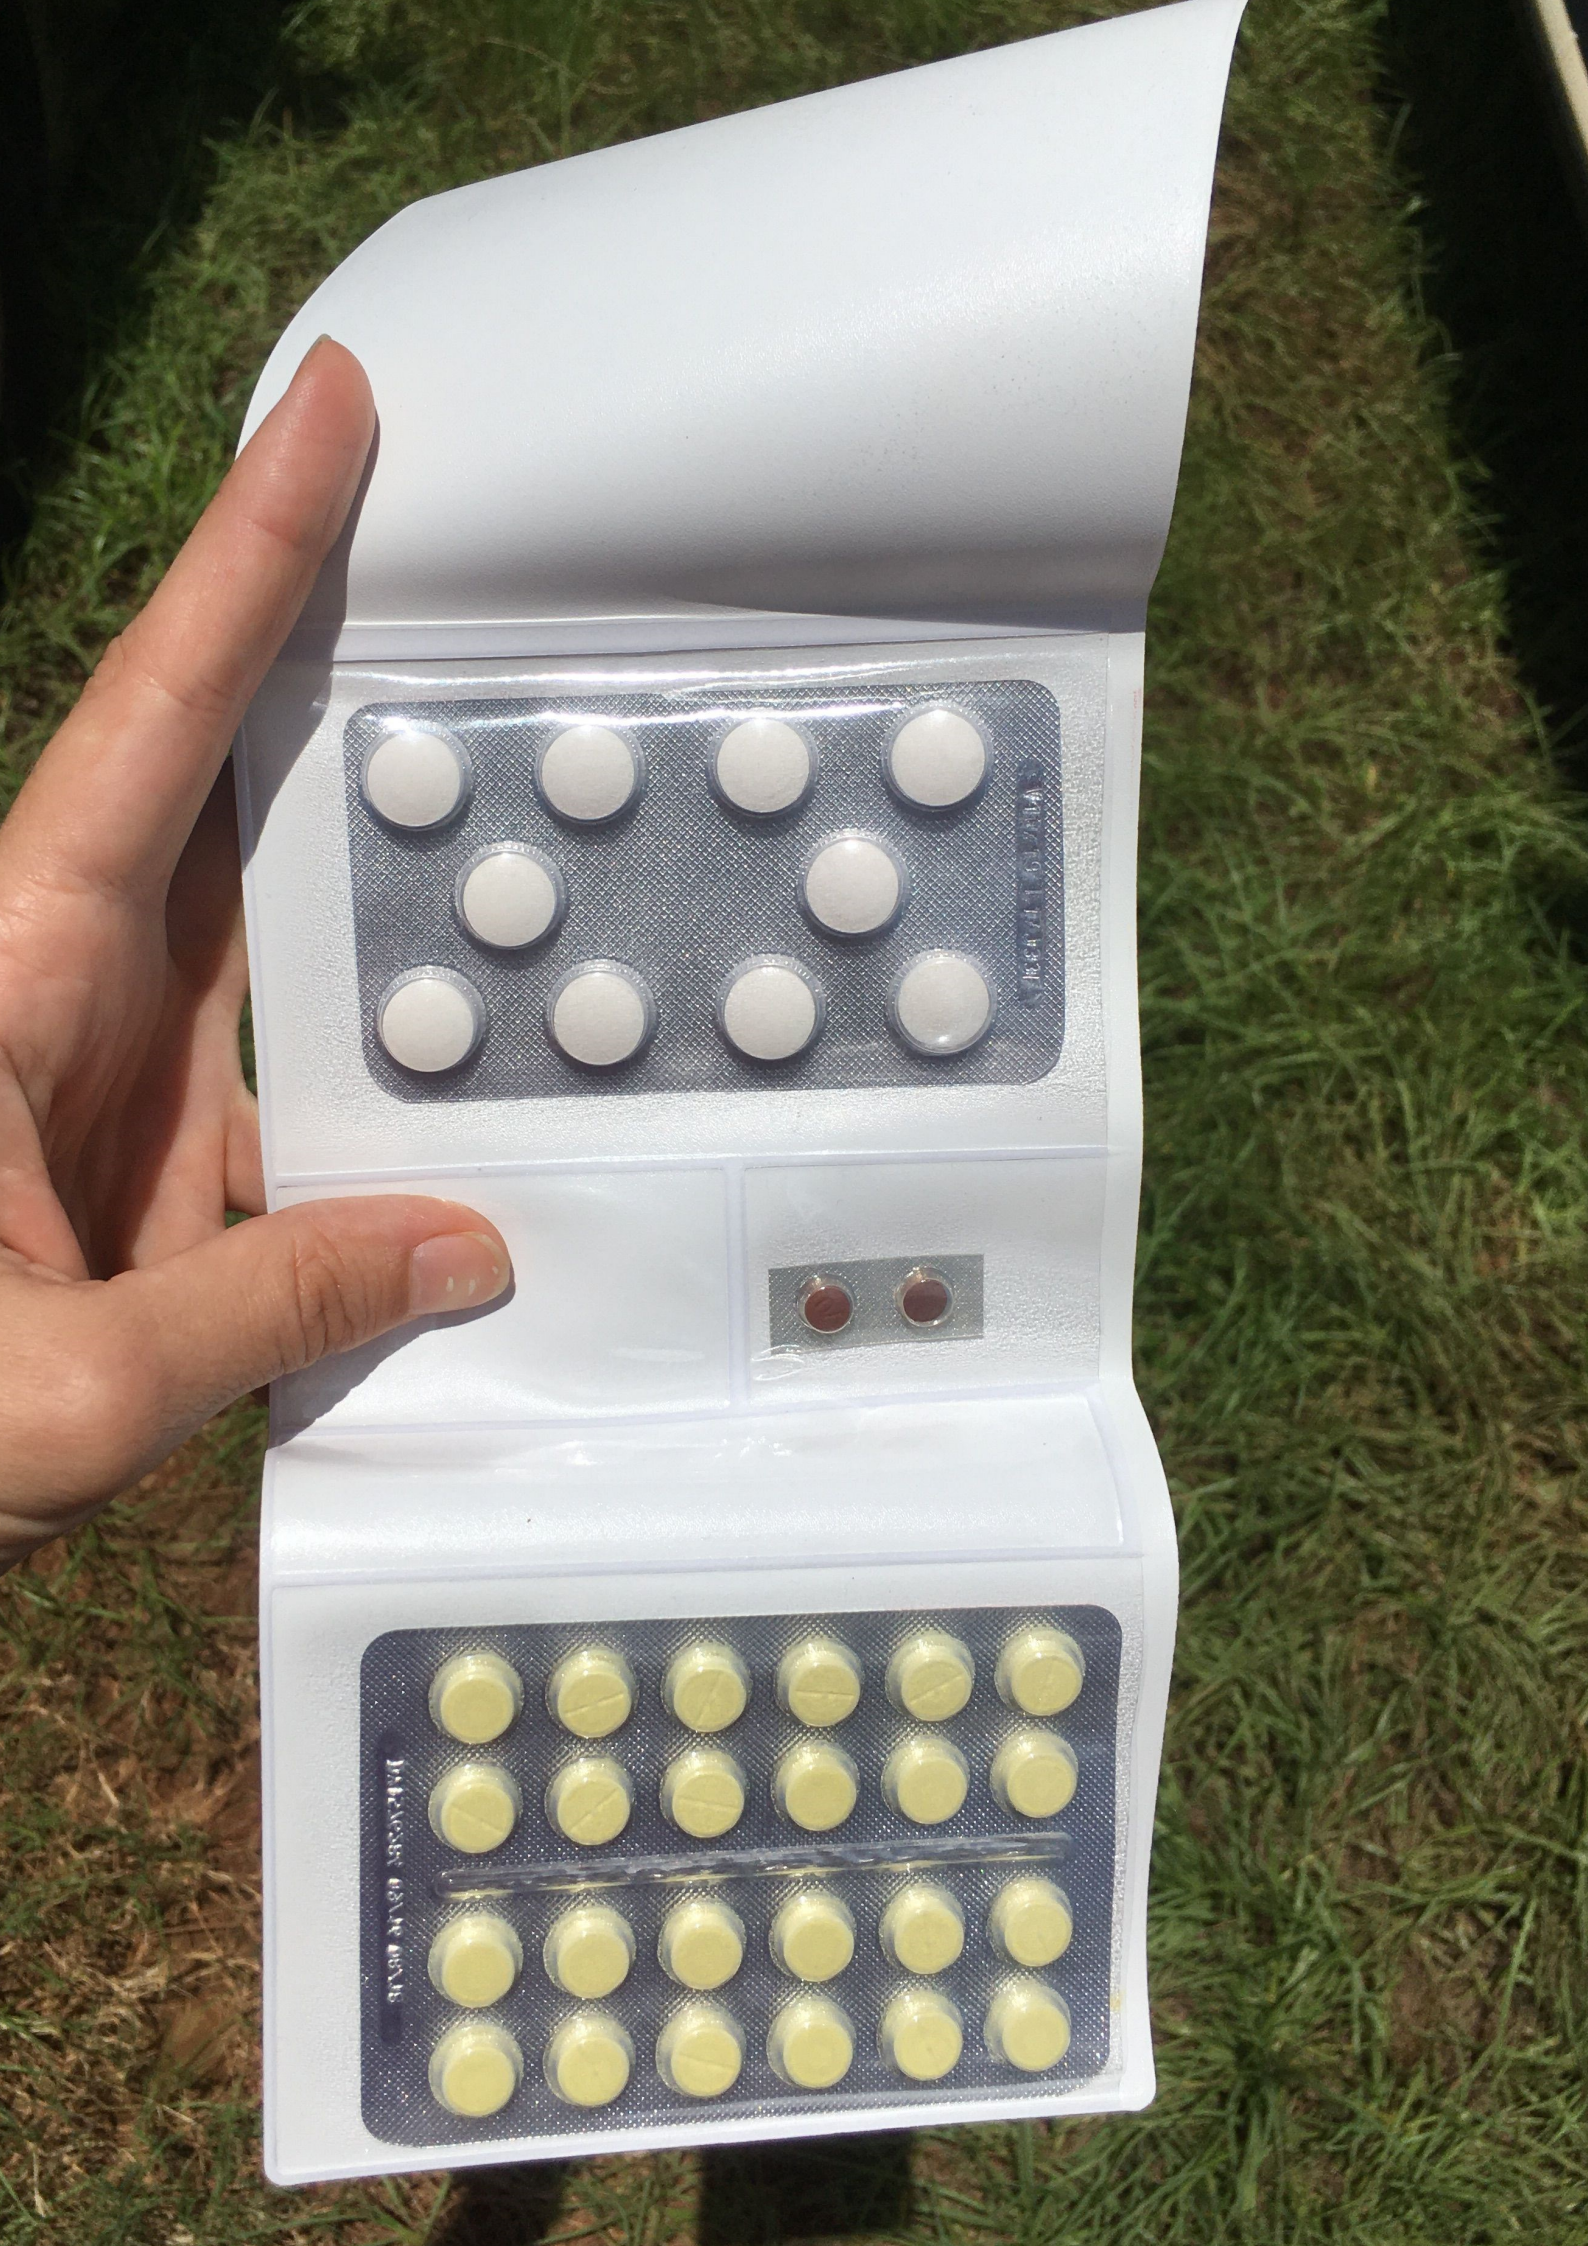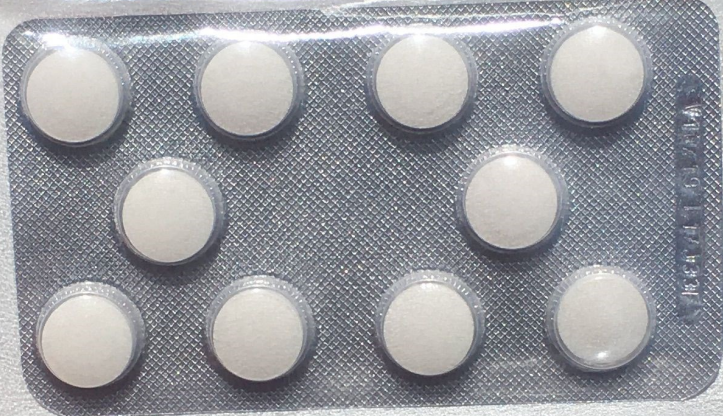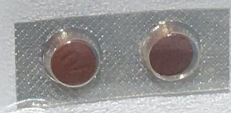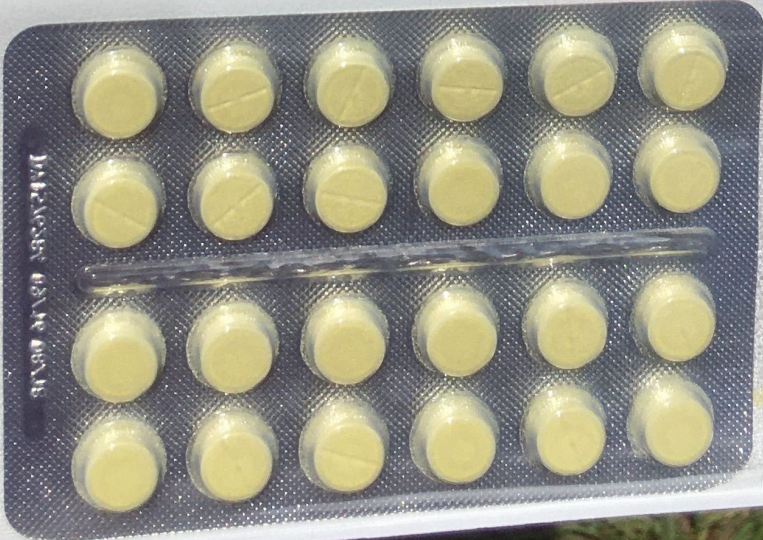

Supplement: 12936_2021_3748_MOESM5_ESM.pdf [file 12936_2021_3748_MOESM5_ESM.pdf]
