# Supplementary material for: Setting-up a cross-border action-research project to control malaria in remote areas of the Amazon: describing the birth and milestones of a complex international project (Malakit)
Source: PubMed Central journal article supplement (PMC8111981; doi:10.1186/s12936-021-03748-5), 2021-05-11
Supplement: 12936_2021_3748_MOESM7_ESM.pdf [file 12936_2021_3748_MOESM7_ESM.pdf]

## Tools and contents for facilitator training

- Facilitator material:
  - Information about the project including the baseline-endline study “Orpal”
  - Tasks of the facilitator
  - Participants’ rights as part of Good Clinical Practice
  - Information about the kit medication and RDT, important to know but not to share with participants
  - Wording and language elements for important messages
  - Answers to potential Frequently Asked Questions
- Guide for completing the questionnaire and paper forms by the facilitator
- Detailed instructions for the questionnaire administration and the filling of the paper forms.
- Kit assembly training tool: Sept-by-step pictured guide
- Illustrated memo of the order of the stages of training and enrollment :

Malakit: Estágios de inclusão

|                                                                                                                                                                      |                                                                                     |                                                                                                  |                                                                                       |
|----------------------------------------------------------------------------------------------------------------------------------------------------------------------|-------------------------------------------------------------------------------------|--------------------------------------------------------------------------------------------------|---------------------------------------------------------------------------------------|
| <p>1. Recrutar no máximo 4 pessoas: verifica a idade e sua atividade na Guiana Francesa.</p>                                                                         |    | <p>8. Mostrar o vídeo do kit (TDR)</p>                                                           |    |
| <p>2. Explicar:<br/>         • um treinamento de uma hora<br/>         • um teste com picada (autoteste).<br/>         • assinar um formulário de consentimento.</p> |   | <p>9. Mostrar a instruções no kit</p>                                                            |   |
| <p>3. Mostrar o vídeo sobre o Malakit</p>                                                                                                                            |  | <p>10. Parte pratica do teste (TDR)</p>                                                          |  |
| <p>4. Mostrar o kit</p>                                                                                                                                              |  | <p>11. Durante o tempo de espera, explicar como fazer o tratamento</p>                           |  |
| <p>5. Falar com o participante sobre os seus conhecimentos e experiência em matéria de malária</p>                                                                   | <p>Você já teve malária?<br/>Quais são os sintomas da malária?</p>                  | <p>12. Apresentar a nota explicativa, preencher e mandar assinar os formulários</p>              |  |
| <p>6. Mostrar e explicar os desenhos</p>                                                                                                                             |  | <p>13. Questionário, colar as etiquetas e scanner e verificar leitura do teste (compreensão)</p> |  |
|                                                                                                                                                                      |                                                                                     | <p>14. Dar na cartinha</p>                                                                       |  |
|                                                                                                                                                                      |                                                                                     | <p>15. Entregar o kit e o mosquiteiro</p>                                                        |  |
