# Supplementary material for: Setting-up a cross-border action-research project to control malaria in remote areas of the Amazon: describing the birth and milestones of a complex international project (Malakit)
Source: PubMed Central journal article supplement (PMC8111981; doi:10.1186/s12936-021-03748-5), 2021-05-11
Supplement: 12936_2021_3748_MOESM10_ESM.pdf [file 12936_2021_3748_MOESM10_ESM.pdf]

# Uma infecção - um remédio adaptado

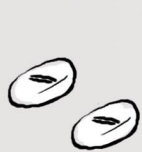

Virus (Zika, Dengue, gripe...)

=

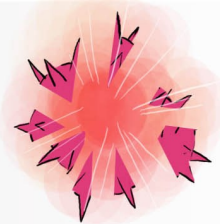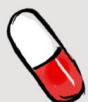

Bactéria (Dor de ouvido...)

=

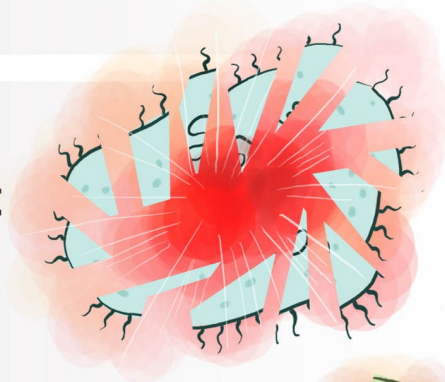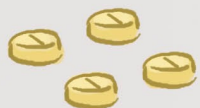

Parasite (Malária,...)

=

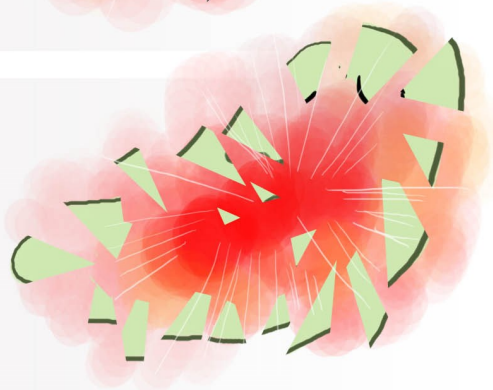

Um remédio para uma bactéria por exemplo, pode não ter efeito sobre um parasita.

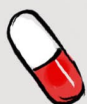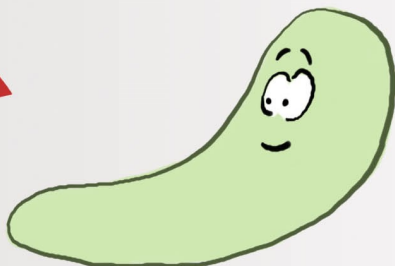

=

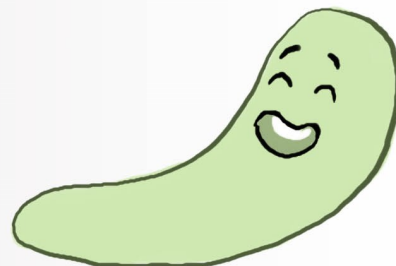

**O REMEDIO DA MALÁRIA TAMBÉM É ESPECÍFICO**

Antes  
Coartem

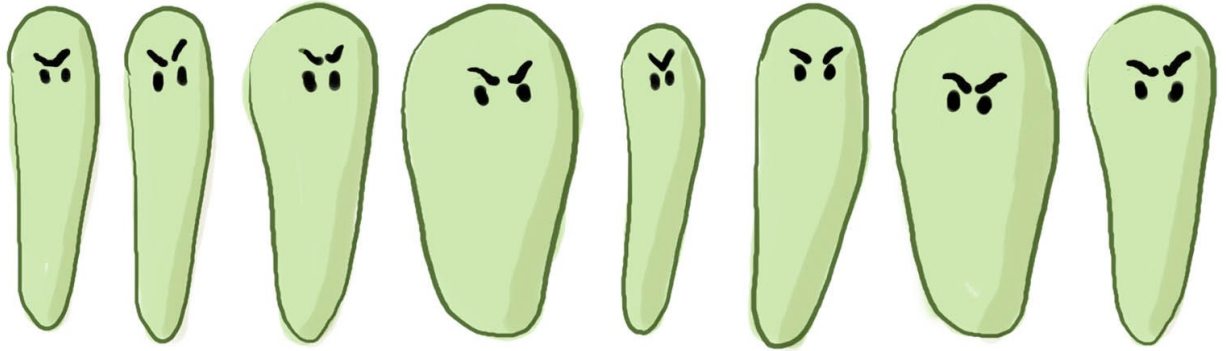

Dia 1  
Coartem

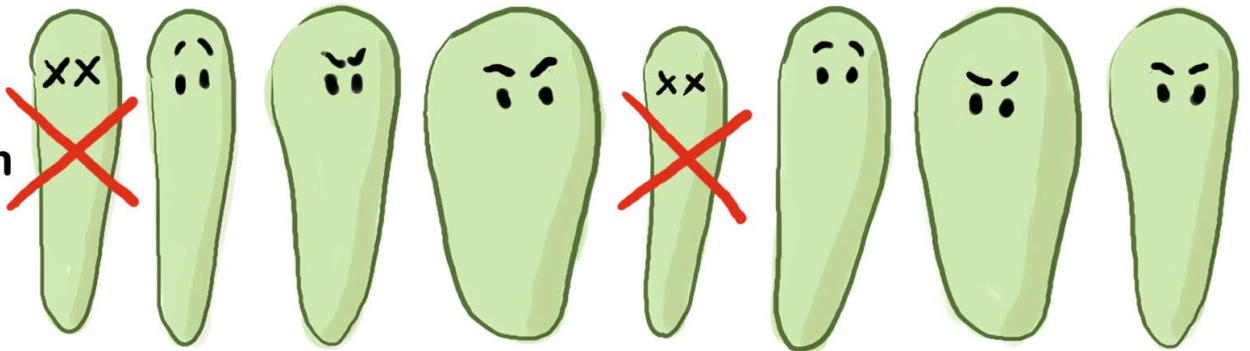

Dia 2  
Coartem

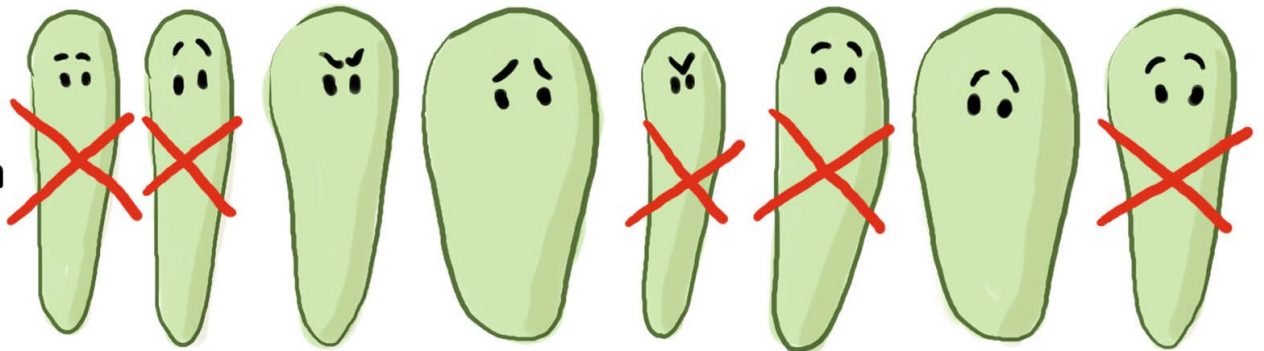

Fim do  
coartem

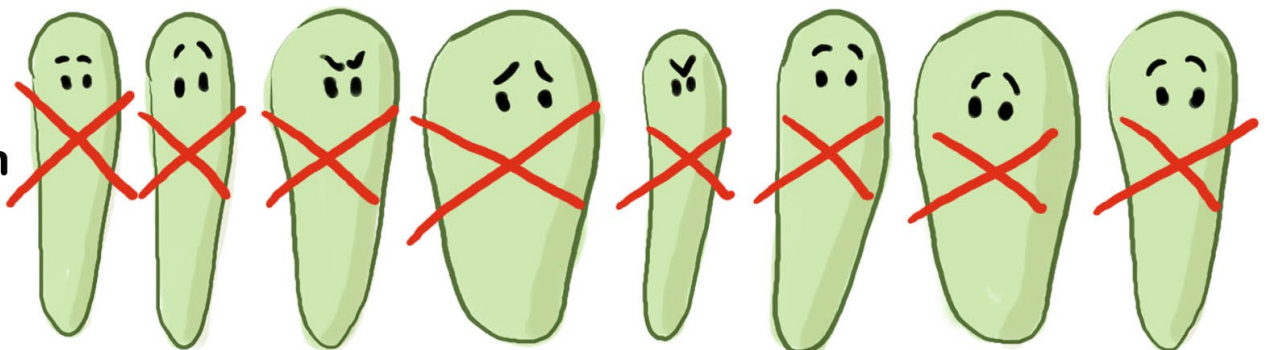

# Parasita da Malária

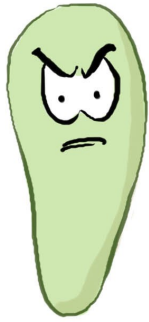

**FALCI**

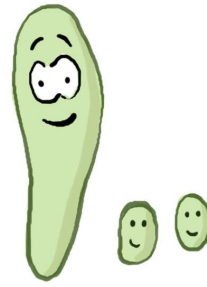

**VIVAX**

Onde  
está o  
parasita ?

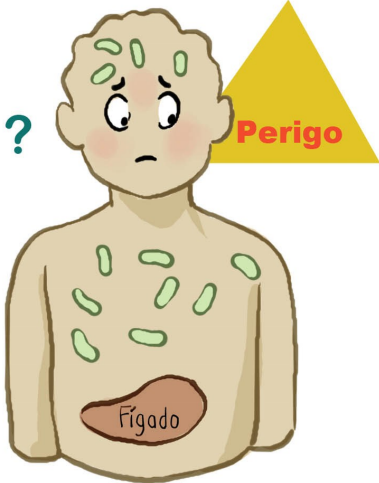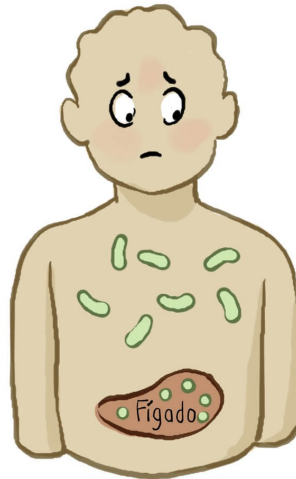

Efeito  
do  
COARTEM

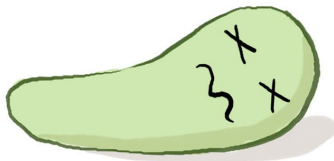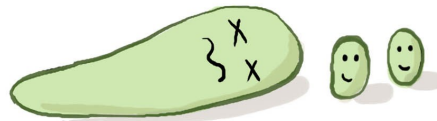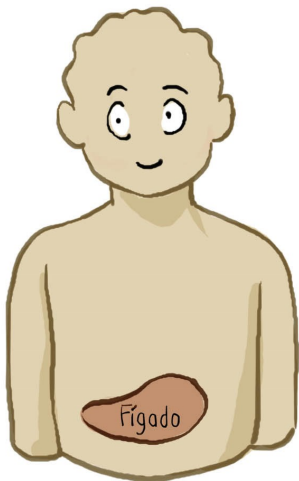

**Eliminado  
completamente  
do corpo**

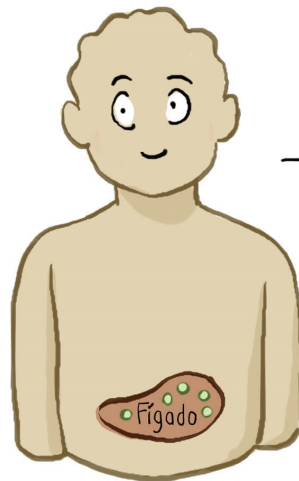

**Eliminado  
do corpo menos  
do fígado**

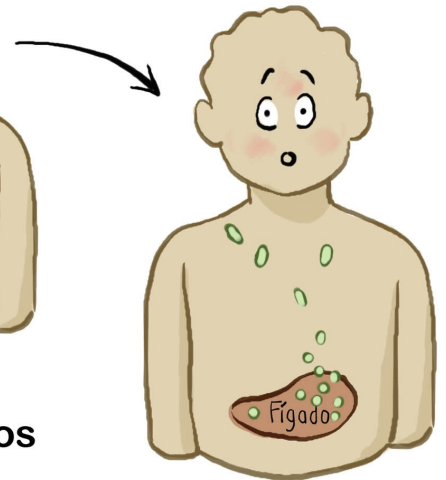

**Se um mês depois você  
tiver malária de novo,  
talvez seja o vivax que  
se acordou**

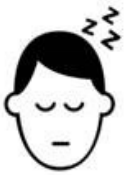

Sonolento

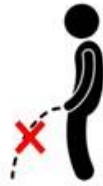

Eu não urino mais

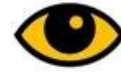

Olhos amarelados

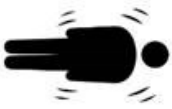

Convulsões

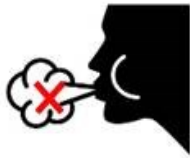

Problemas para respirar

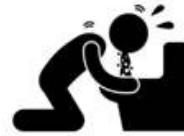

Vômitos

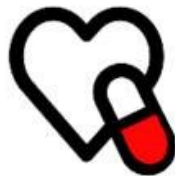

Faço um tratamento para o coração
